# Supplementary material for: DNA methylation profiling to predict overall survival risk in gastric cancer: development and validation of a nomogram to optimize clinical management
Source: PubMed Central journal article supplement (PMC7255367; doi:10.7150/jca.44436), 2020-04-27
Supplement: jcav11p4352s1.pdf [file jcav11p4352s1.pdf]

# Supplementary Figure S1

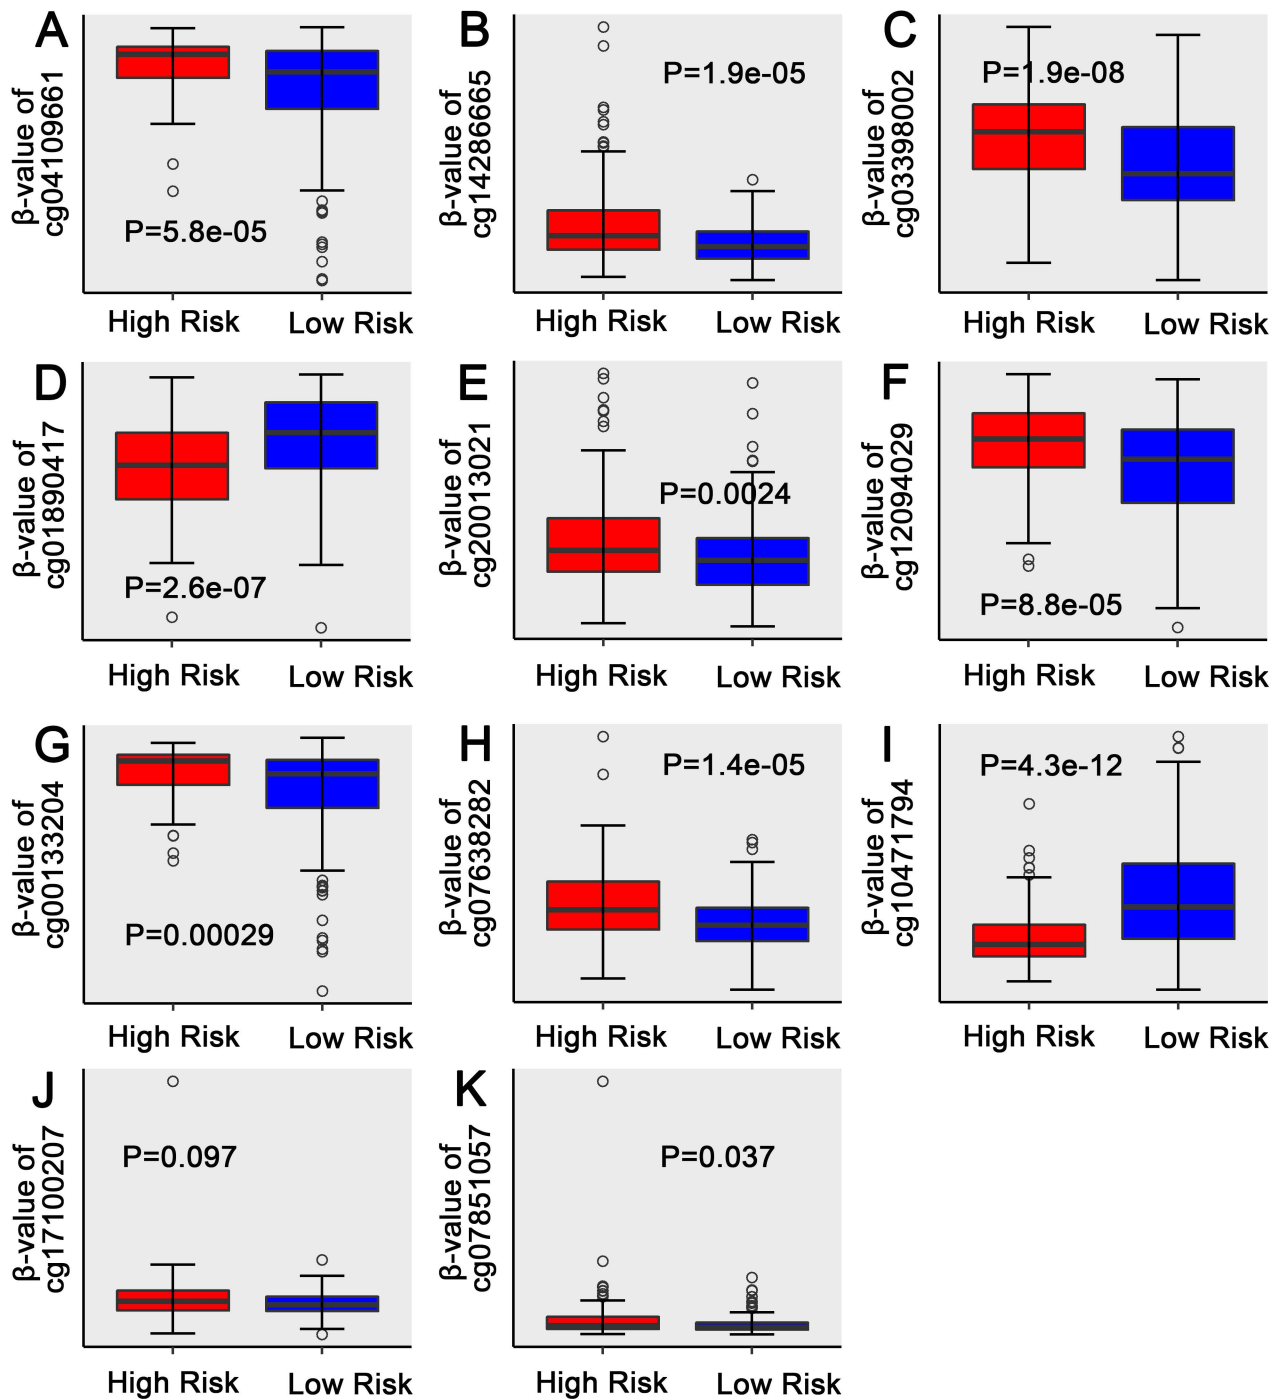



# Supplementary Figure S3

## A

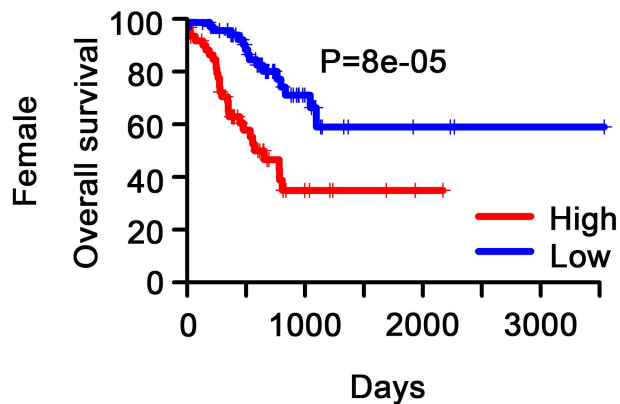

## B

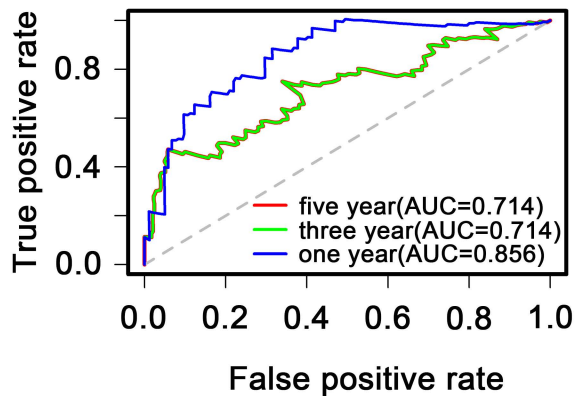

## C

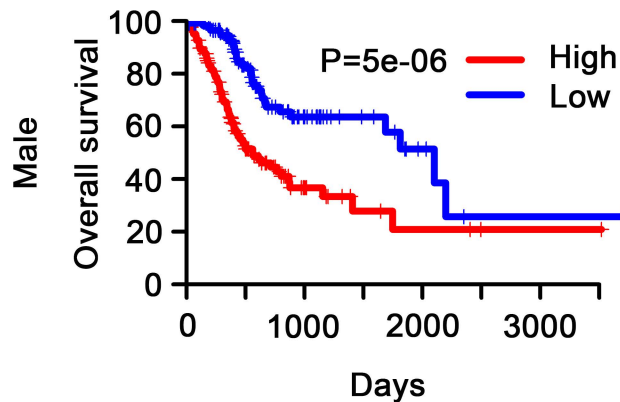

## D

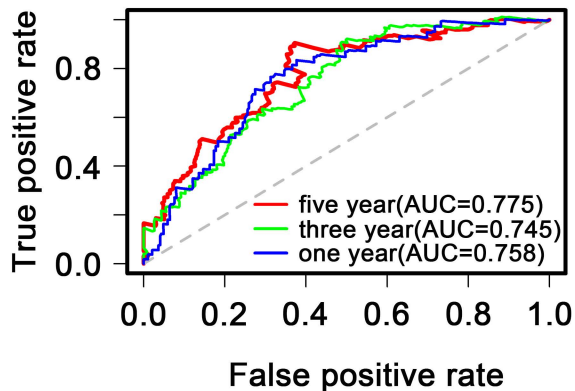

# Supplementary Figure S4

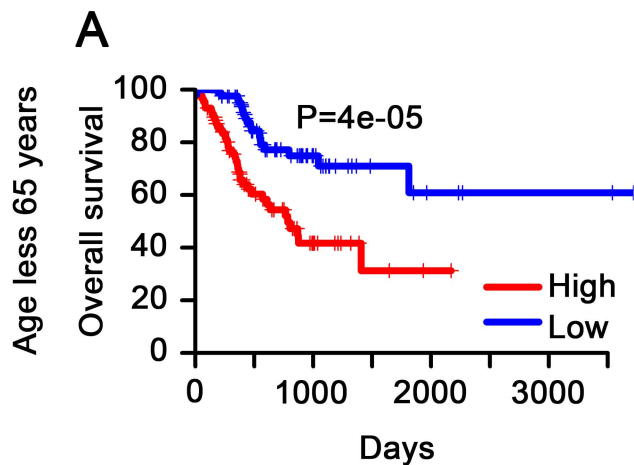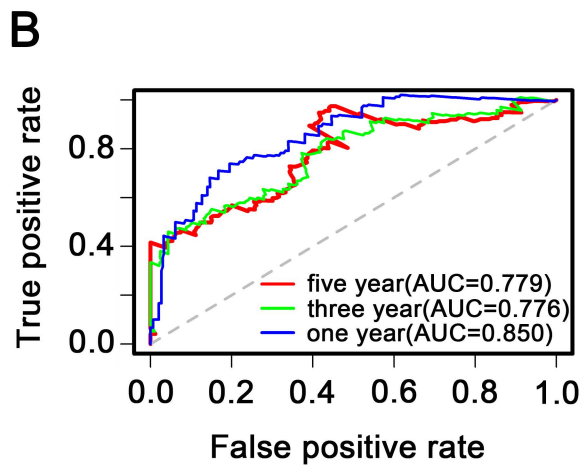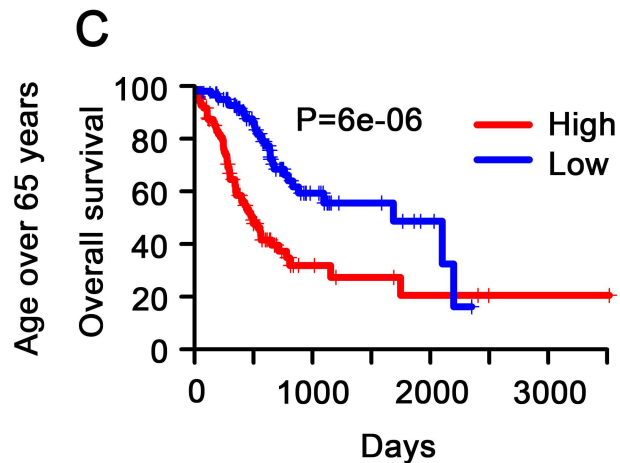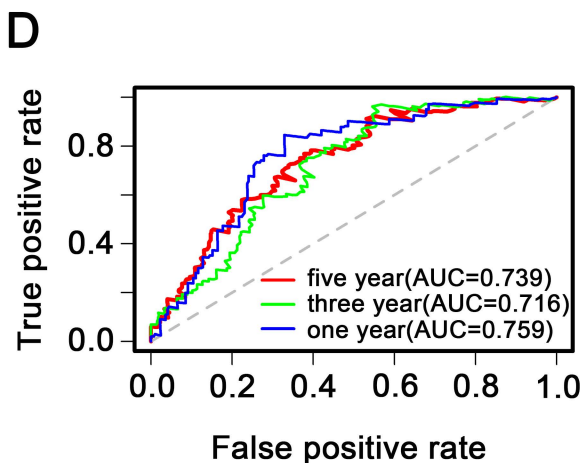

# Supplementary Figure S5

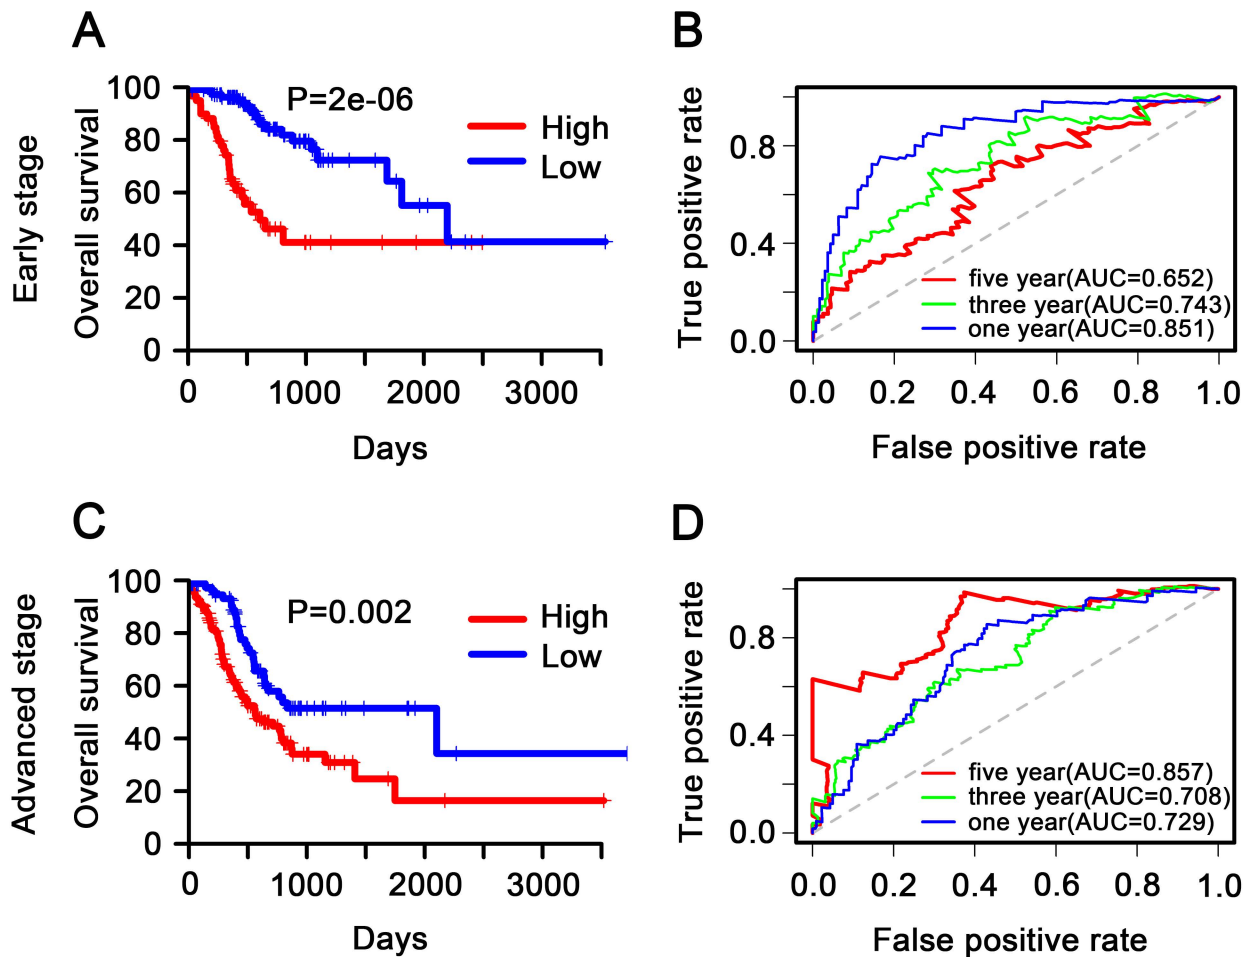

# Supplementary Figure S6

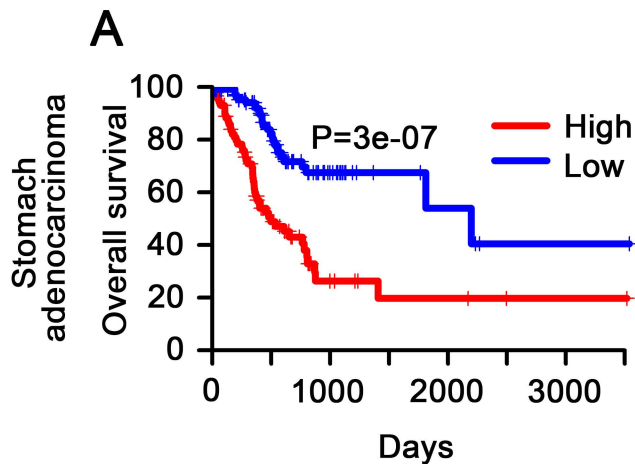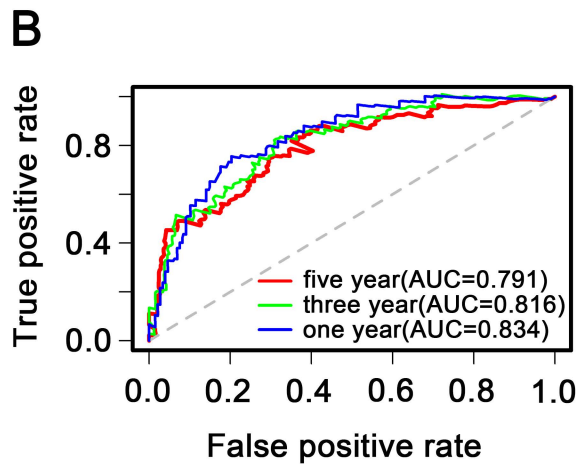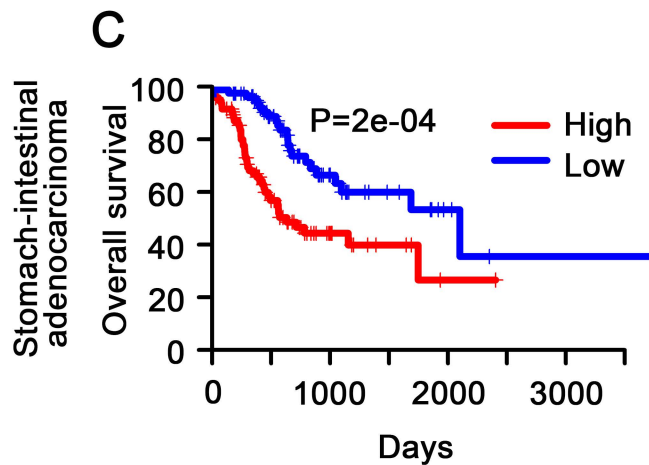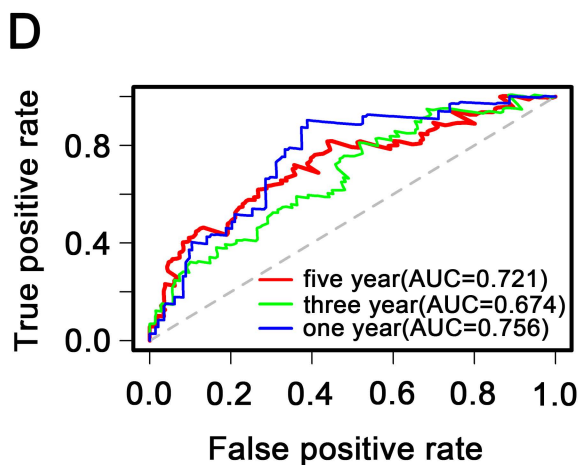

# Supplementary Figure S7

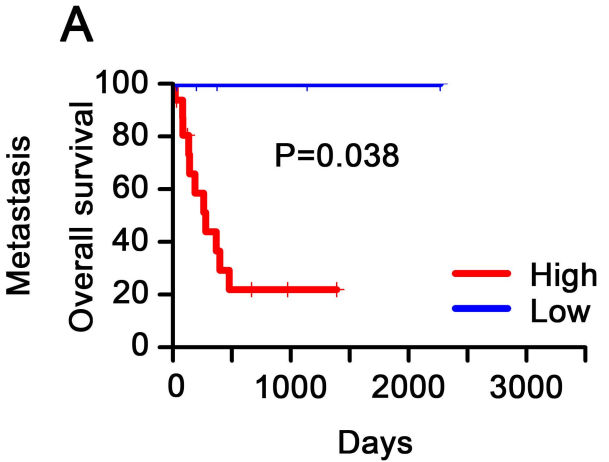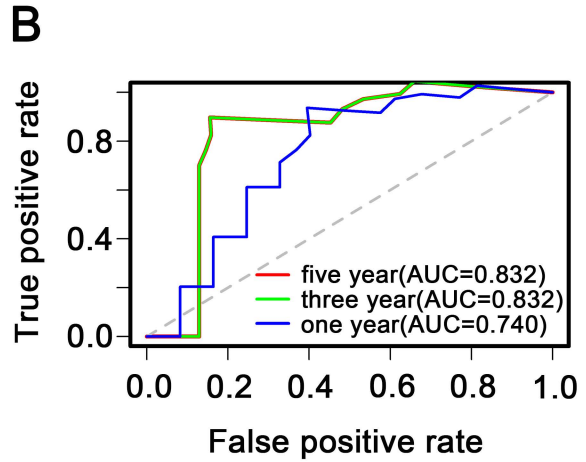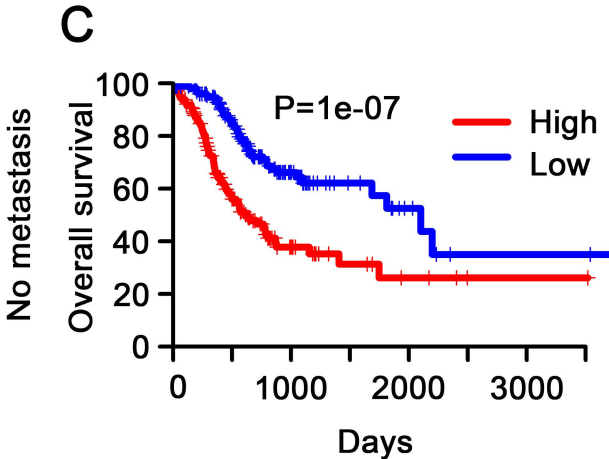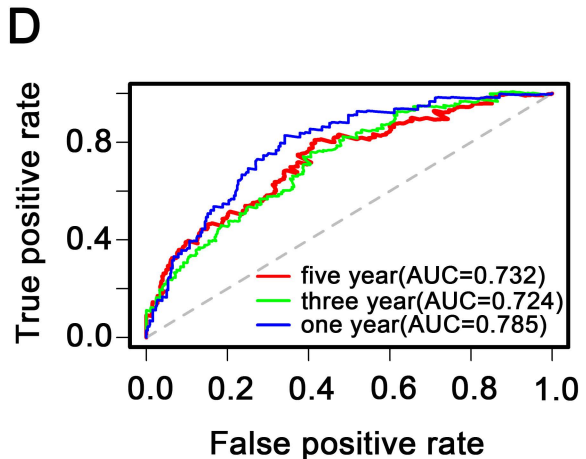

# Supplementary Figure S8

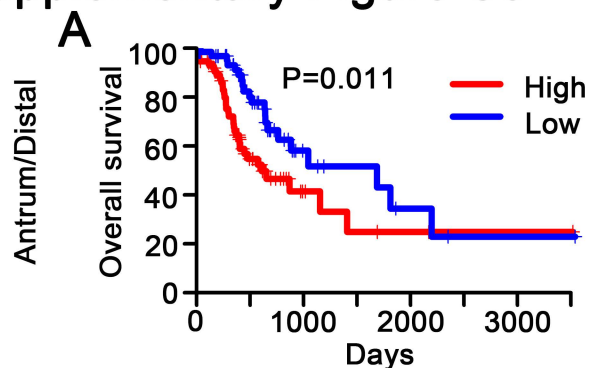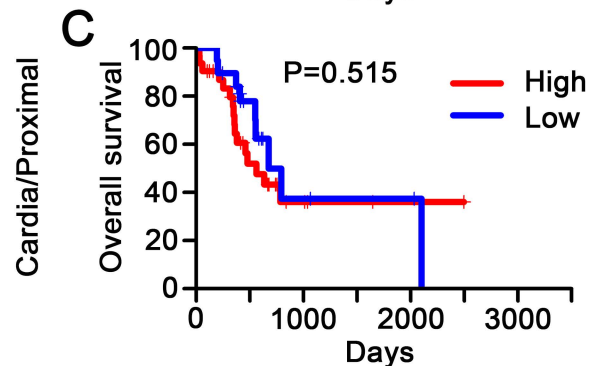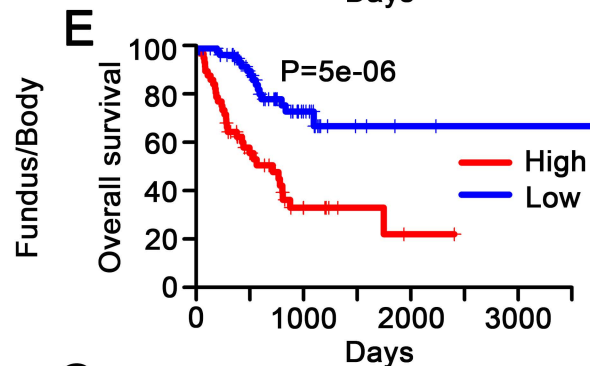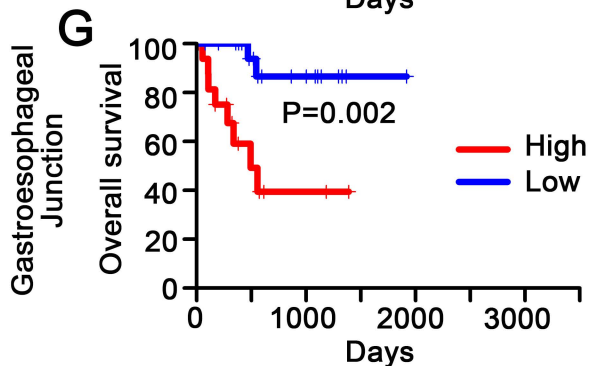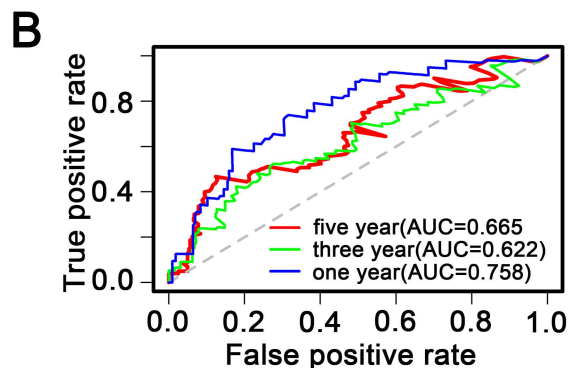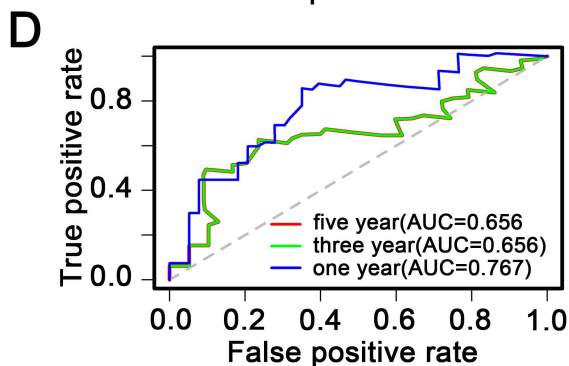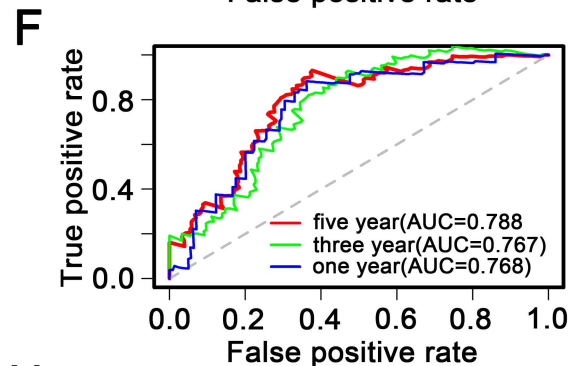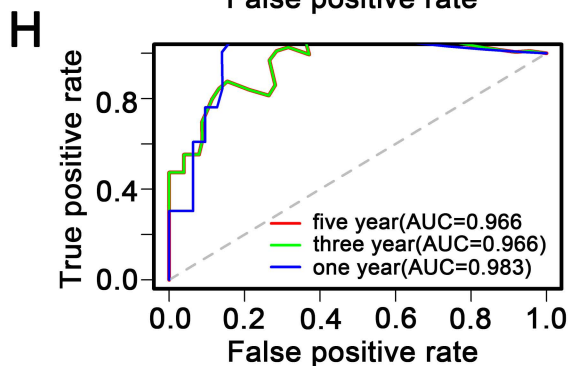



## **Supplementary Figure legends**

**Supplementary Figure S1. Boxplots of methylation  $\beta$  values against risk group in the training dataset.**

**Supplementary Figure S2. Boxplots of methylation  $\beta$  values against risk group in the testing dataset.**

**Supplementary Figure S3. Kaplan-Meier and ROC analysis of patients with STAD in sub-groups according to sex, respectively. (A, B) Female sub-group. (C, D) Male sub-group.**

**Supplementary Figure S4. Kaplan-Meier and ROC analysis of patients with STAD in sub-groups according to age, respectively. (A, B) Age less 65 years sub-group. (C, D) Age over 65 years sub-group.**

**Supplementary Figure S5. Kaplan-Meier and ROC analysis of patients with STAD in sub-groups according to stage, respectively. (A, B) Early stage sub-group. (C, D) Advanced stage sub-group.**

**Supplementary Figure S6. Kaplan-Meier and ROC analysis of patients with STAD in sub-groups according to pathological type, respectively. (A, B) Stomach adenocarcinoma sub-group. (C, D) Stomach-intestinal adenocarcinoma sub-group.**

**Supplementary Figure S7. Kaplan-Meier and ROC analysis of patients with STAD in sub-groups according to metastasis status, respectively. (A, B) Metastasis sub-group. (C, D) No metastasis sub-group.**

**Supplementary Figure S8. Kaplan-Meier and ROC analysis of patients with STAD in sub-groups according to anatomic site, respectively. (A, B) Antrum/Distal sub-group. (C, D) Cardia/Proximal sub-group. (E, F) Fundus/Body sub-group. (G, H) Gastroesophageal Junction sub-group.**
